# Supplementary material for: A perylene-based fluorescent probe for highly efficient SDS detection
Source: Royal Society of Chemistry journal article supplement (doi:10.1039/d4ay02122c), 2025-01-01
Supplement: d4ay02122c1.pdf [file d4ay02122c1.pdf]

## Supporting information

### A Perylene-based Fluorescent Probe for Highly Efficient SDS Detection

Amrit Kaur,<sup>a,#</sup> Mina Bagherifard,<sup>a,#</sup> Alissa Brooke Anderson,<sup>a</sup> Neelam Tariq,<sup>a</sup> Zois Syrgiannis,<sup>a</sup> and Ioannis Spanopoulos<sup>a,\*</sup>

<sup>a</sup>Department of Chemistry, University of South Florida, Tampa, Florida 33620, United States

**Corresponding author:**

[spanopoulos@usf.edu](mailto:spanopoulos@usf.edu)

#### Table of contents

Section S1. Materials and methods

Section S2. Synthesis section

Section S3. Characterization

a. <sup>1</sup>H NMR

b. <sup>13</sup>C NMR

c. MALDI TOF studies

Section S4. Experimental data

a. Temperature-dependent UV-vis and fluorescence studies

b. UV-vis measurements

c. Detection limit calculation

d. Comparative and competitive analysis of interfering analytes

e. Zeta potential studies

f. Time-resolved fluorescence studies

g. Fluorescence studies in presence of tap water

Section S5. References

## S1. Materials and methods

### Starting materials

All starting materials for synthesis were purchased commercially and were used without further purification. 3,4,9,10-Perylenetetracarboxylic 3,4:9,10- dianhydride (98%), and methyl iodide were purchased from Sigma-Aldrich; 1-(3-aminopropyl)imidazole (98%) was purchased from Fischer. Sodium dodecyl sulfate (SDS, 98%), glycerol, dimethylformamide, methanol (HPLC grade), metal ions and salts for UV-vis and fluorescence studies were purchased from Thermo Fischer.

### <sup>1</sup>H-NMR and <sup>13</sup>C-NMR

The <sup>1</sup>H and <sup>13</sup>C NMR experiments were recorded using a Bruker AVANCE III HD 600 MHz in DMSO -d<sub>6</sub> as solvent. Data are reported as follows: chemical shifts in ppm, multiplicity (s= singlet, br= broad, t= triplet, multiplet = m, *J* = coupling constant represented in Hz).

### MALDI-TOF

The mass was detected using Bruker UltraFleXtreme MALDI-TOF/TOF equipped with Smartbeam II, 2 GHz for MS and 1 GHz for MS/MS, and FlashDetector™ with 5 GS/s 10-bit digitizer for enhanced dynamic range. Ultra-pure alpha-Cyano-4-hydroxycinnamic acid matrix was used for sample investigations.

### UV-Vis Spectroscopy

UV-Vis spectra were recorded on Shimadzu UV-1900i.

### PL/TRPL/PLQY Measurements

PL and TRPL studies were performed using an Edinburgh Instruments FS5 spectrofluorometer equipped with a 150 W xenon lamp, a 475 nm EPL picosecond pulsed diode laser, and an integrating sphere for PLQY determination.

### SEM Scanning Electron Microscopy

SEM measurements were recorded on a high-resolution thermal field emission source Hitachi SU-70. Data were acquired with an accelerating voltage of 16 kV. The samples were prepared by pressing the powder on to a substrate of carbon adhesive tape and tilting the sample to 30 degrees. The electron beam energy was set to 16 keV.

### Zeta Potential

The zeta potential measurements were conducted using a Zetasizer Nano-ZS (Malvern Instruments, NanoSeries) with DTS 1070 cells.

### UV-Vis and Fluorescence studies:

For the UV-Vis and fluorescence titration the 10<sup>-3</sup> M stock of Compound **5** was prepared in the DMSO. A 1.0 mM stock solution of SDS was prepared by dissolving 2.8 mg SDS in 10.0 mL distilled water. A 10.0 μM concentration of compound **5** was used for each titration. The standard solution (10<sup>-1</sup> M to 10<sup>-3</sup> M stock) of various metal ions such as Na<sup>+</sup>, K<sup>+</sup>, Ca<sup>2+</sup> and Mg<sup>2+</sup> ions were prepared by dissolving their chloride salts. The 10<sup>-1</sup> M to 10<sup>-3</sup> M stock solution of inorganic anions (I<sup>-</sup>, Br<sup>-</sup>) were prepared by dissolving their tertabutylammonium salt, while anions such as SO<sub>4</sub><sup>2-</sup>, NO<sub>3</sub><sup>-</sup>, CH<sub>3</sub>COO<sup>-</sup>, were

prepared by dissolving their potassium and sodium salt in 1 mL in distilled water. For the interference and competitive studies, 1.0 mM concentration of metal ions and anions was added to the titration experiment. In titration experiments, each time a 3.0 mL solution of compound **5** (30.0  $\mu\text{L}$  compound **5** in 2970  $\mu\text{L}$  distilled water) was filled in a quartz cuvette (path length, 1 cm) and spectra were recorded after the addition of appropriate analyte. For the detection of SDS in the household samples, household's samples (0.5 mL) were dissolved in water (15 mL); a clear solution was obtained through centrifugation for 90 minutes at 40000 rpm and stood for 48 h.<sup>1</sup>

## S2. Synthesis

Synthesis of 2,9-bis(3-(1H-imidazol-1-yl)propyl)anthra[2,1,9-def:6,5,10-d'e'f']diisoquinoline-1,3,8,10(2H,9H)-tetraone (Compound **3**):

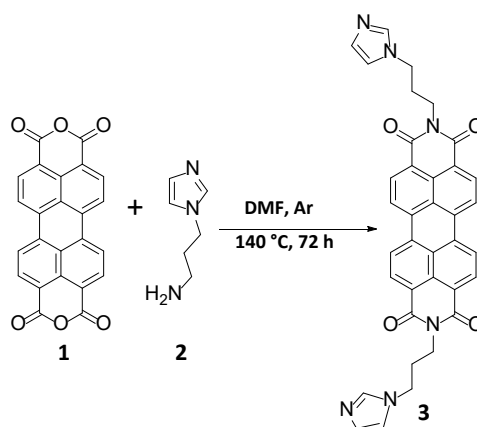

**Scheme 1** Synthesis pathway for compound **3**

To a well-stirred suspension of perylene-3,4,9,10-tetracarboxylic dianhydride **1** (1 g, 2.7 mmol) in 80 mL dry dimethylformamide, 1-(3-aminopropyl)imidazole **2** (1.5 g, 5.86 mmol) was added dropwise, followed by purging of the reaction mixture under argon (Ar) for 10 minutes. Afterward, the resulting mixture was refluxed at 140 °C for 72 h. Then, the red precipitate was filtered off and thoroughly washed with cold water and methanol to yield compound **3** (1.50 g, 93%). The melting point of compound **3** was >295 °C. As compound **3** has poor solubility in the available deuterated solvents, <sup>1</sup>H and <sup>13</sup>C NMR spectra were obtained only after methylation i.e compound **5**.

Synthesis of Compound **5**<sup>2</sup>:

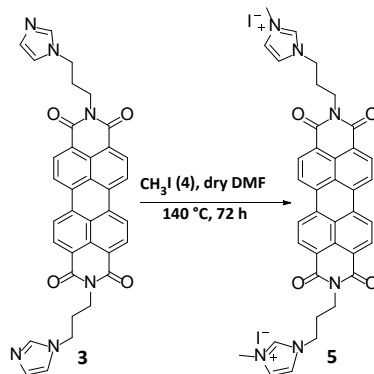

**Scheme 2** Synthesis pathway for compound **5**

To a well-stirred suspension of compound **3** (1.0 g, 1.1 mmol) in 30 mL dry DMF, methyl iodide (2.5 equiv.) was added dropwise. The resultant mixture was refluxed for 72 h at 140 °C. The reaction mixture was cooled down, and the resultant solvent was removed under vacuum. The obtained solid was washed with water and methanol resulting in the pure compound **5** in 90% yield as reddish brown solid.  $^1\text{H}$  NMR (600 MHz, DMSO- $d_6$ )  $\delta$  (ppm) = 9.19 (s, 2H), 8.60 (d,  $J = 6$  Hz, 4H), 8.35 (d,  $J = 6$  Hz, 4H), 7.87 (s, 2H), 7.79 (s, 2H), 4.37 (t,  $J = 18$  Hz, 4H), 4.16 (br, 4H), 3.93 (s, 6H), 2.31-2.30 (m, 4H);  $^{13}\text{C}$  NMR (600 MHz, DMSO- $d_6$ )  $\delta$  (ppm) = 163.27, 137.17, 133.93, 131.02, 128.50, 125.34, 124.44, 124.12, 122.75, 122.69, 47.43, 37.35, 36.32, 28.88. MALDI-TOF:  $[\text{M-I}]^{2+}$  calculated for  $[\text{C}_{38}\text{H}_{32}\text{N}_6\text{O}_4]^{2+}$  is 636.247; and found to be 636.247.

### S3. Characterization:

#### NMR

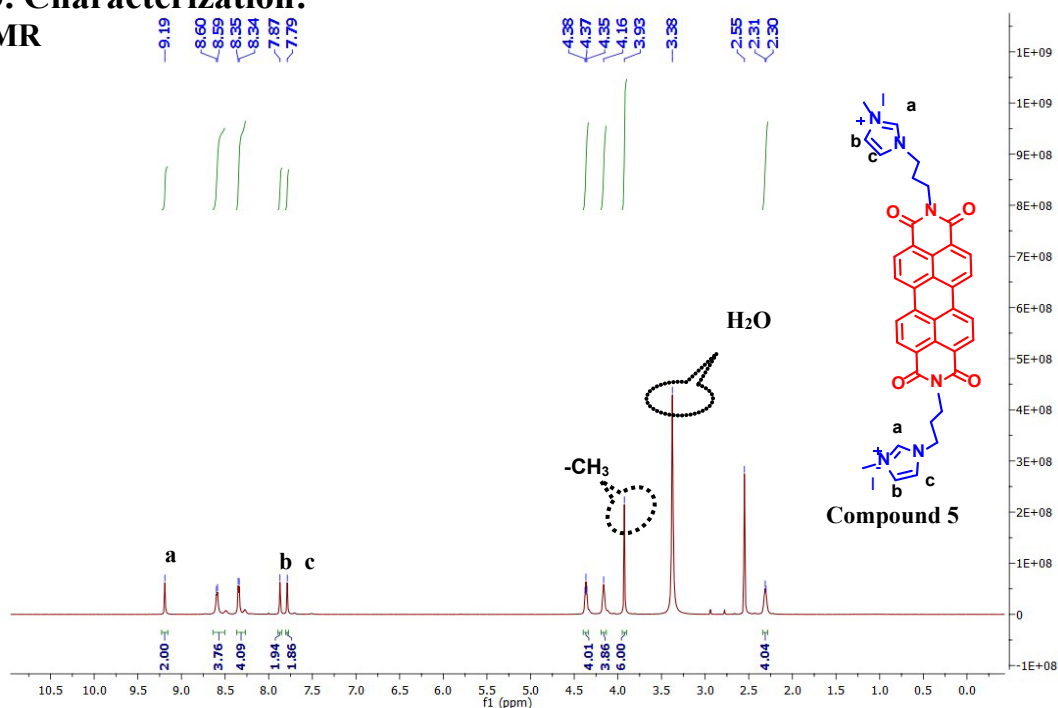

Fig. S1 The  $^1\text{H}$ -NMR spectrum of compound **5** in DMSO- $d_6$  at 600 MHz.

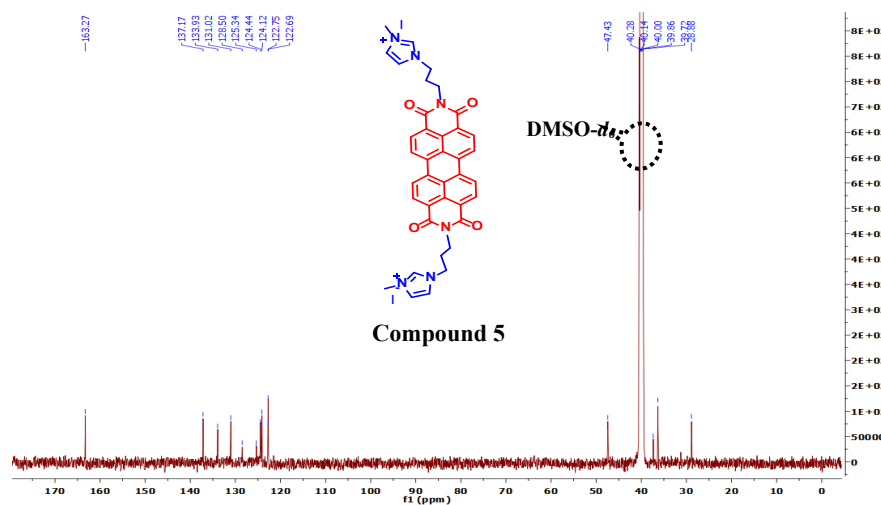

Fig. S2 The  $^{13}\text{C}$ -NMR spectrum of compound **5** in DMSO- $d_6$  at 600 MHz.

## MALDI-TOF

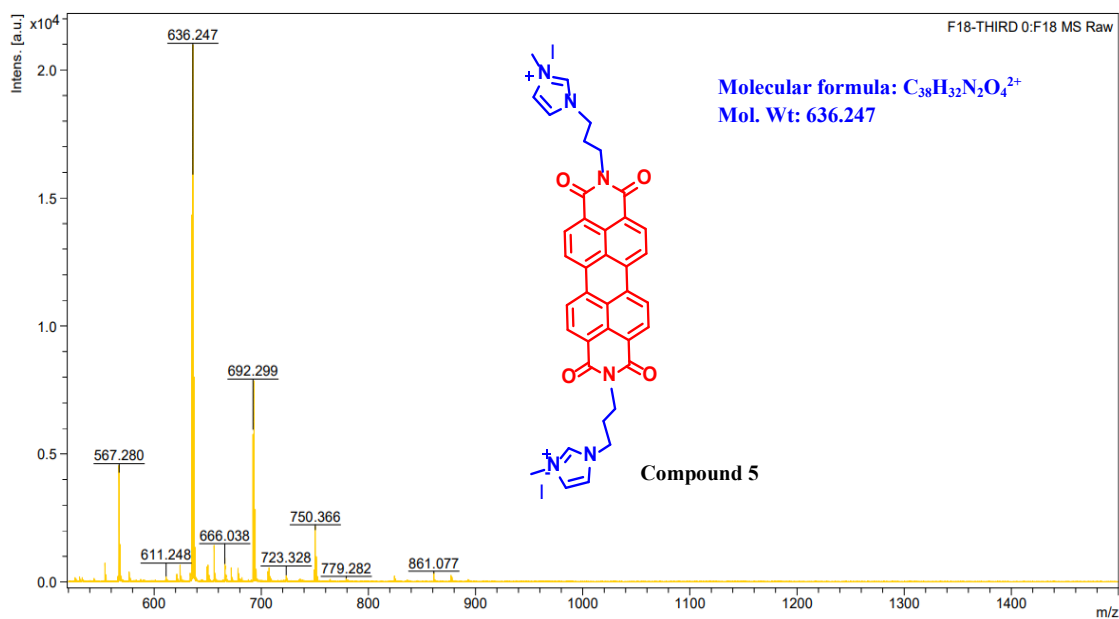

Fig. S3 The MALDI-TOF spectrum of compound 5.

## S4. Experimental data

### Temperature-dependent UV-vis and fluorescence emission spectra of compound 5

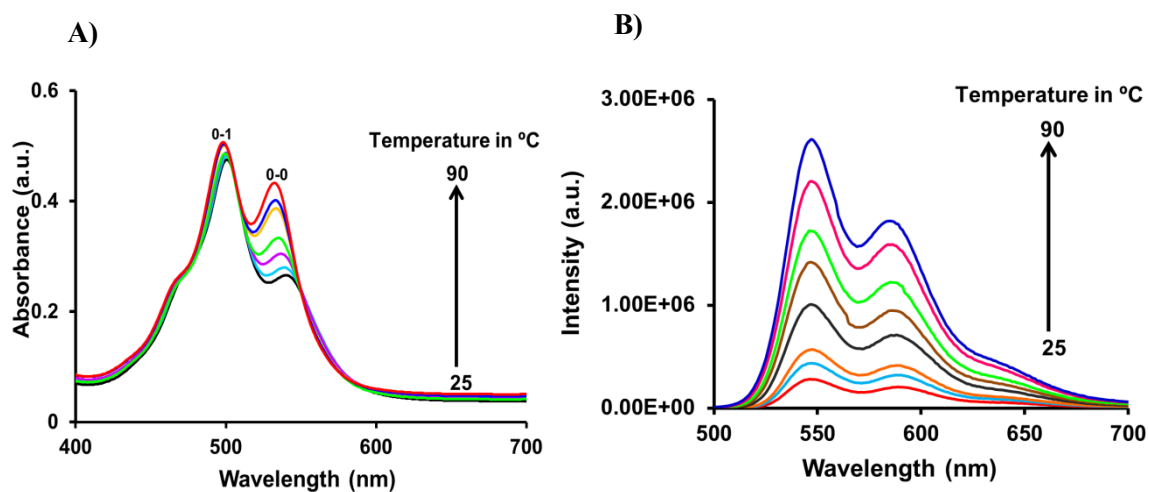

Fig. S4 A) The absorption and B) fluorescence spectra of compound 5 (10  $\mu$ M) showing changes in absorption and emission intensity upon increasing temperature from 25 °C - 90 °C in 99% vol. fraction of H<sub>2</sub>O in DMSO at  $\lambda_{ex}$  = 490 nm.

### UV-vis spectra of compound 5 upon addition of SDS

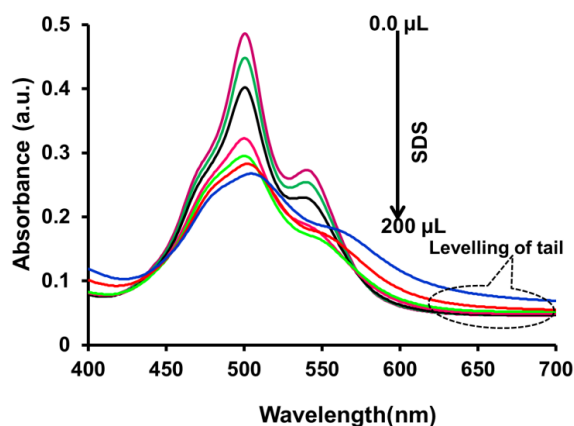

**Fig. S5** The absorption spectra of compound **5** (10.0  $\mu\text{M}$ ) upon addition of 1.0 mM SDS solution (0.00-200.0  $\mu\text{L}$ ) in 99% vol. fraction of  $\text{H}_2\text{O}$  in DMSO.

### Detection Limit Calculations of Compound 5 for SDS

The detection limit was calculated based on the fluorescence titration using the standard calibration method.<sup>3</sup> To determine the S/N ratio, the emission intensity of compound **5** without SDS was measured 10 times and the standard deviation of blank measurements was determined. The detection limit is then calculated with the following equation:  $\text{DL} = 3 \times \text{SD}/\text{S}$ , where SD is the standard deviation of the blank solution measured 10 times; S is the slope of the calibration curve. From the graph, the slope was found ( $S$ ) = -15,01,467.08, Thus using the formula, a Detection Limit ( $\text{DL}$ ) =  $8.65 \times 10^{-5}$  M (86.5  $\mu\text{M}$ ) is determined.

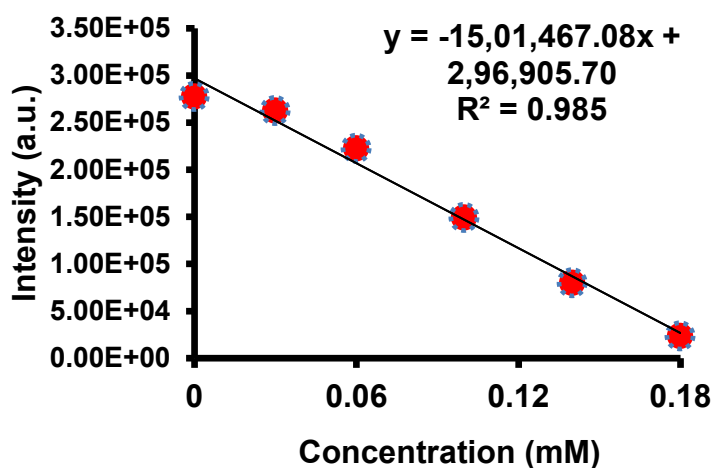

**Fig. S6** The fluorescence response of compound **5** (10.0  $\mu\text{M}$ ) to various concentrations of SDS in 99%  $\text{H}_2\text{O}$  in DMSO at  $\lambda_{\text{ex}} = 490$  nm.

## Comparative and Competitive Analysis of Interfering Analytes

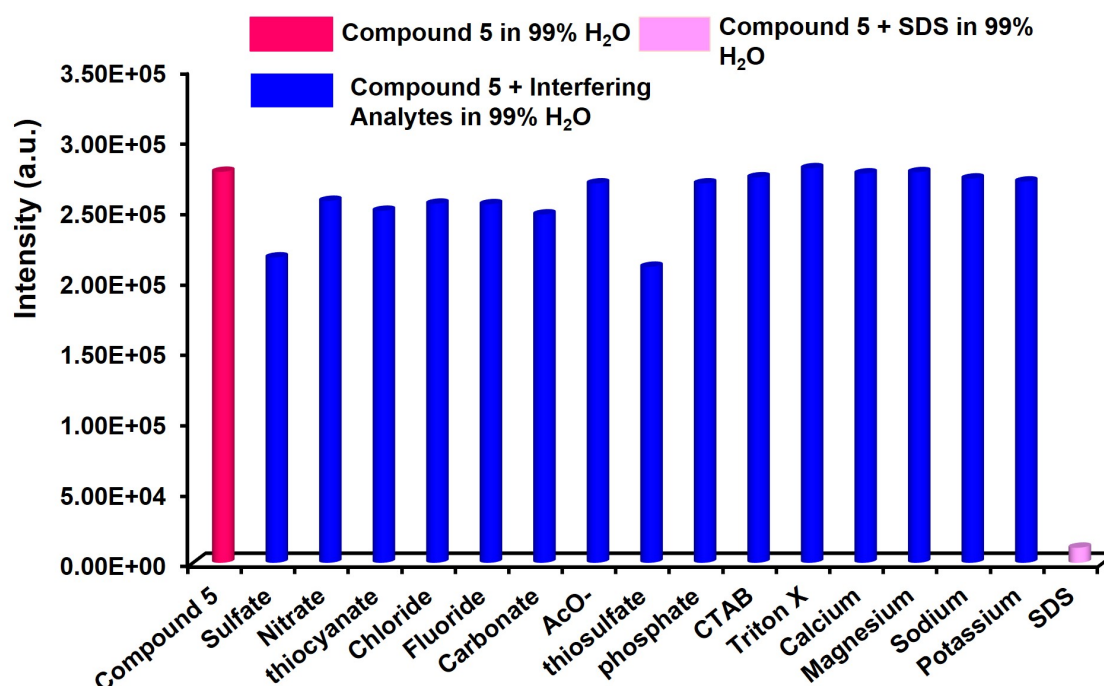

**Fig. S7** The fluorescence emission response for compound **5** ( $10.0 \mu\text{M}$ ) in 99% vol. fraction  $\text{H}_2\text{O}$  in DMSO in the presence of various interfering analytes (0-1.0 mM) at  $\lambda_{\text{ex}} = 490 \text{ nm}$ . The red column represents the fluorescence emission of the probe alone; the blue columns represent the fluorescence emission of the probe with each interfering substance added; and the light pink column represents the fluorescence emission of the probe after SDS is added as an interfering agent.

## Zeta Potential of Compound 5, SDS and Compound 5-SDS

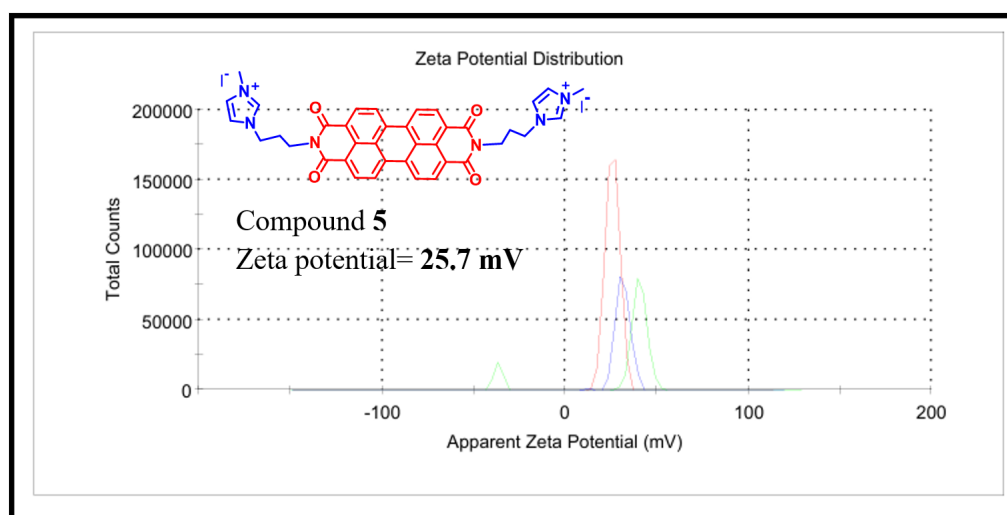

**Fig. S8** The graph depicts the zeta potential of compound **5** ( $10.0 \mu\text{M}$ ) in a 99% vol. fraction of  $\text{H}_2\text{O}$  in DMSO.

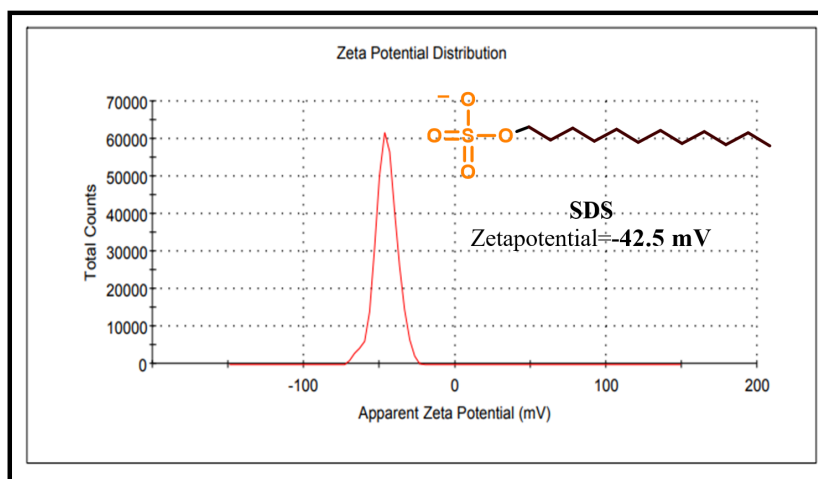

**Fig. S9** The graph depicts the zeta potential of SDS (10.0  $\mu\text{M}$ ) in 99% vol. fraction of  $\text{H}_2\text{O}$  in DMSO.

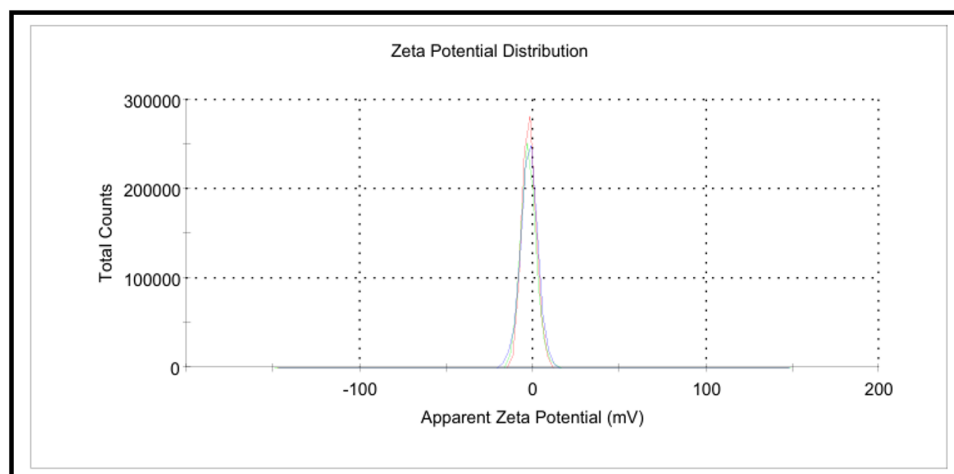

**Fig. S10** The graph depicts the zeta potential of compound 5 (10.0  $\mu\text{M}$ ) in the presence of SDS (10.0  $\mu\text{M}$ ) in a 99% vol. fraction of  $\text{H}_2\text{O}$  in DMSO.



## Time-resolved fluorescence studies

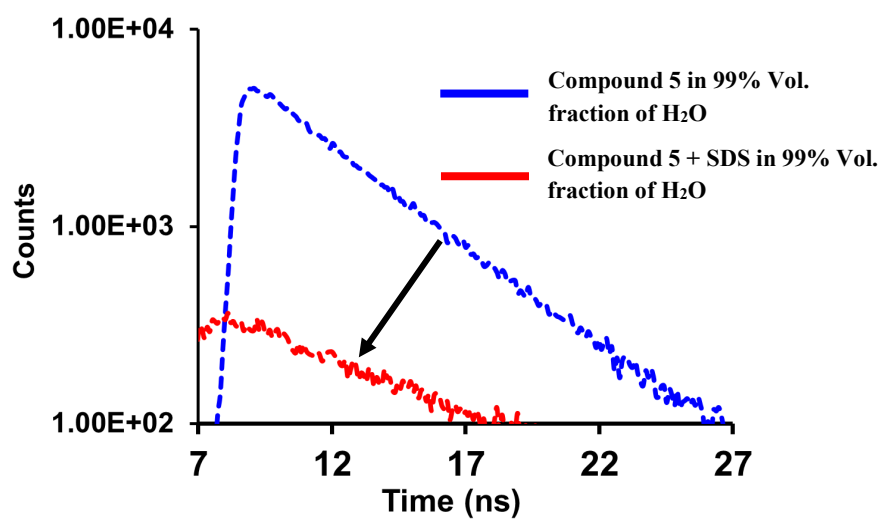

**Fig. S11** The time-resolved fluorescence spectra of compound **5** (10.0  $\mu\text{M}$ ) upon the addition of SDS (1.0 mM) in 99% H<sub>2</sub>O:DMSO at  $\lambda_{\text{ex}} = 475$  nm.

**Table S1.** The table showcases various household items tested for the presence of the SDS surfactant (See also Figure 3C).

| SAMPLE.NO | Sample            | SDS DETECTION |
|-----------|-------------------|---------------|
| 1         | Handwash 1        | √             |
| 2         | Handwash 2        | √             |
| 3         | Handwash 3        | √             |
| 4         | Bodywash 1        | √             |
| 5         | Bodywash 2        | √             |
| 6         | Dishwasher1       | √             |
| 7         | Dishwasher 2      | √             |
| 8         | Dishwasher 3      | √             |
| 9         | Dishwasher 4      | √             |
| 10        | Facewash          | √             |
| 11        | Shampoo 1         | √             |
| 12        | Shampoo 2         | √             |
| 13        | Shampoo 3         | √             |
| 14        | Shampoo 4         | x             |
| 15        | Surface Cleaner 1 | x             |
| 16        | Surface Cleaner 2 | x             |
| 17        | Lens Cleaner      | x             |

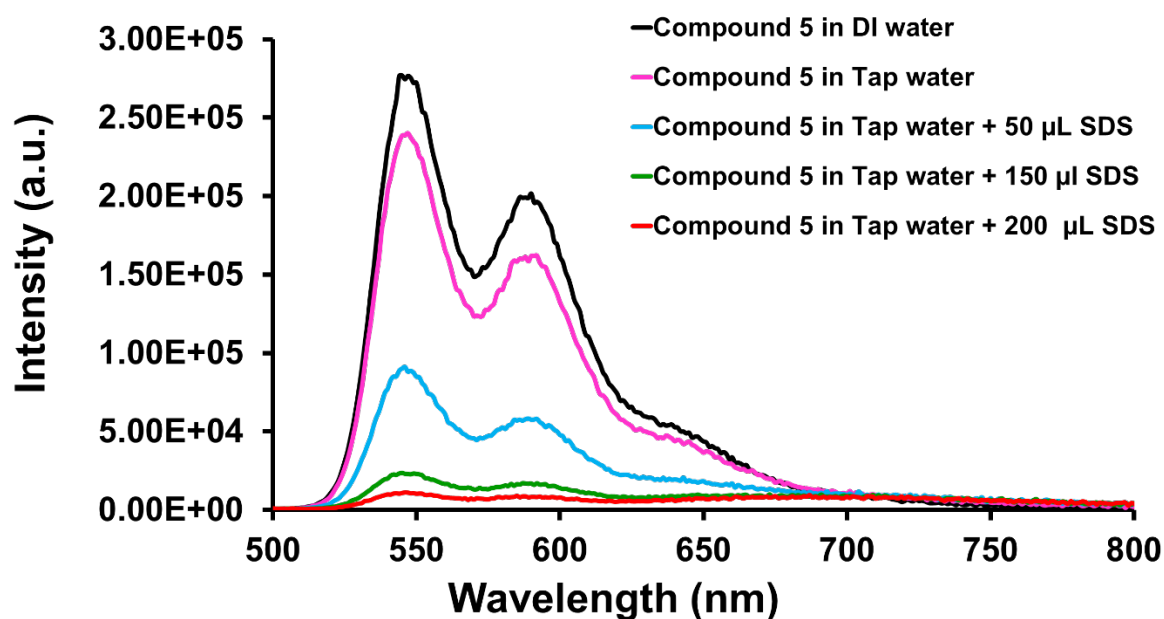

**Fig. S12** The fluorescence spectra of Compound 5 (10.0 μM) upon addition of SDS (0-1.0 mM) in 150-times diluted tap water at  $\lambda_{ex}$  = 490 nm.

**Table S2.** The detection of SDS in 150-times diluted tap water

| Sample Number | concentration added (mM) | concentration found (mM) | RSD (N=5) | % Recovery |
|---------------|--------------------------|--------------------------|-----------|------------|
| 1             | 0.050                    | 0.045                    | 0.005     | 90         |
| 2             | 0.200                    | 0.200                    | 0.021     | 100        |

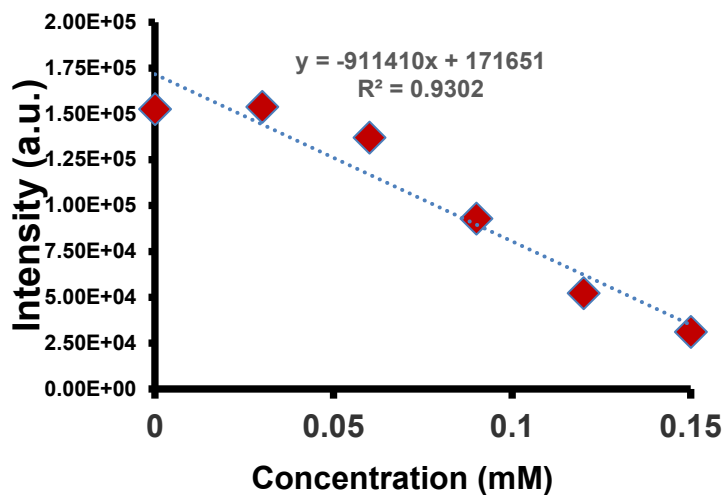

**Fig. S13** The fluorescence response of Compound **5** (10.0  $\mu$ M) upon addition of SDS (0-0.15 mM) in H<sub>2</sub>O using no dilution, at  $\lambda_{\text{ex}} = 490$  nm.

**Table S3.** Overview of literature reports on SDS detection.

| #.  | Material                                                                                                       | Solvent system of detection                    | Response time                                          | Application                                                                                                     | Journal                                                 |
|-----|----------------------------------------------------------------------------------------------------------------|------------------------------------------------|--------------------------------------------------------|-----------------------------------------------------------------------------------------------------------------|---------------------------------------------------------|
| 1.  | Compound 5, PBI-Imidazolium based dye                                                                          | DMSO:H <sub>2</sub> O (0.1:9.9, V:V)           | <10s                                                   | <ul style="list-style-type: none"> <li>SDS in household items</li> <li>Detection of SDS in tap water</li> </ul> | This work                                               |
| 2.  | zirconium(IV)-based metal-organic framework (MOF) <sup>4</sup>                                                 | Deionized water to make probe suspension       | 50s the preparation of sample for PL studies takes 24h | <ul style="list-style-type: none"> <li>Detection of SDS in various water samples</li> </ul>                     | <i>Inorg. Chem.</i> 2023, <b>62</b> , 8605–8614         |
| 3.  | quaternary ammonium complex of (2-(methylthio)indeno[1,2,3-gh]phenanthridin-1-yl)(phenyl)methanon <sup>5</sup> | DMSO                                           | -                                                      | <ul style="list-style-type: none"> <li>SDS in household items</li> </ul>                                        | <i>J. Surfactants Deterg.</i> 2024,                     |
| 4.  | UiO-66-NH <sub>2</sub> @Au NCs <sup>6</sup>                                                                    | Deionized water                                | 4 min                                                  | <ul style="list-style-type: none"> <li>SDS in household items</li> </ul>                                        | <i>Anal. Chem.</i> 2024, <b>96</b> , 4987–4996.         |
| 5.  | 5-hydroxytryptamine Derived carbon nanoparticle <sup>7</sup>                                                   | In DMSO:H <sub>2</sub> O (3:1,v:v)             | NA                                                     | <ul style="list-style-type: none"> <li>SDS in tap water and urine</li> </ul>                                    | <i>Dyes Pigm.</i> 2022, <b>208</b> , 110859             |
| 6.  | 3-ethylbenzothiazolium iodide dyes <sup>8</sup>                                                                | CH <sub>3</sub> CN:PBS (2:8,v:v)               | 12 min                                                 | <ul style="list-style-type: none"> <li>Detection of SDS in various water samples</li> </ul>                     | <i>Anal. Methods</i> , 2021, <b>13</b> , 3292           |
| 7.  | Graphene oxide encapsulated Rhodamine DyeRBGO <sup>9</sup>                                                     | --                                             | 20 min                                                 | <ul style="list-style-type: none"> <li>SDS in household items</li> </ul>                                        | <i>Anal. Methods</i> , 2019, <b>11</b> , 5826           |
| 8.  | Rhodamine conjugated pyrene dye <sup>10</sup>                                                                  | CH <sub>3</sub> CN :H <sub>2</sub> O (1:9,v:v) | 6 hrs                                                  | <ul style="list-style-type: none"> <li>Various surfactants</li> </ul>                                           | <i>Sens. Actuators, B</i> 2021, <b>331</b> , 129408     |
| 9.  | nicotinamide-anthracene conjugates NAAN-1 <sup>11</sup>                                                        | H <sub>2</sub> O/DMSO=9/1, pH = 7              | 30 mins                                                | <ul style="list-style-type: none"> <li>Detection of SDS in various water samples</li> </ul>                     | <i>Sens. Actuators, B</i> , 2017, <b>241</b> , 8–18.    |
| 10. | Green fluorescent protein <sup>12</sup>                                                                        | HEPES buffer                                   | 5 min                                                  | <ul style="list-style-type: none"> <li>SDS in tap water</li> </ul>                                              | <i>J. Sensors</i> 2015, <b>2015</b> , 809065            |
| 11. | TPE-B <sup>13</sup>                                                                                            | Pure water                                     | 30s                                                    | <ul style="list-style-type: none"> <li>SDS in tap water, river water, and drinking water</li> </ul>             | <i>Mater. Sci. Eng. C</i> , 2019, <b>99</b> , 1092–1098 |

## S5. References:

1. G. Usha, R. Prakash, K. Karpagalakshmi, S. Ramalakshmi, L. Piramuthu, C. Yang and N. Selvapalam, *Anal. Methods*, 2019, **11**, 5826-5832.
2. F. D'Anna, S. Marullo, G. Lazzara, P. Vitale and R. Noto, *Chem. Eur. J.*, 2015, **21**, 14780-14790.
3. L. Zeng, T. Chen, B. Zhu, S. Koo, Y. Tang, W. Lin, T. D. James and J. S. Kim, *Chem. Sci.*, 2022, **13**, 4523-4532.
4. S. Ghosh, J. Krishnan, V. Karthik, A. Dhakshinamoorthy and S. Biswas, *Inorg. Chem.*, 2023, **62**, 8605-8614.
5. K. Jamuna, A. T. Sebastian, S. Subbiah, N. Selvapalam and S. Shanmugam, *J. Surfactants Deterg*, 2024, DOI: 10.1002/jsde.12785.
6. D. Wei, H. Zhang, Y. Tao, K. Wang, Y. Wang, C. Deng, R. Xu, N. Zhu, Y. Lu, K. Zeng, Z. Yang, and Z. Zhang, *Anal. Chem.* 2024, **96**, 4987-4996.
7. L. Hu, X.-Qiong Li, Y.-Lei Jia, M.-Jie Wei, H. Ye Li, F.-Ying Kong, W. Wang, Z.-Xia Wang, *Dyes Pigm.* 2022, **208**, 110859.
8. H. Chen, X. Mu, J. Li, Y. Qin, and L. Yan, *Anal. Methods*, 2021, **13**, 3292-3296.
9. G. Usha, R. Prakash, K. Karpagalakshmi, S. Ramalakshmi, L. Piramuthu, C. Yang and N. Selvapalam, *Anal. Methods*, 2019, **11**, 5826.
10. M. Qiao, Y. Cao, T. Liu, L. Ding and Y. Fang, *Sens. Actuators, B* 2021, **331**, 129408.
11. S. Sandhu, R. Kumar, N. Tripathi, H. Singh, P. Singh and S. Kumar, *Sens. Actuators, B*, 2017, **241**, 8-18.
12. L. Ooi, L. Y. Heng, A. Ahmad, *J. Sensors* 2015, **2015**, 809065.
13. Z. Zhou, X. Li, Y. Zhang, C.C. Zhang, Y. Tang, J. Gao, L. Ma and Q. Wang *Mater. Sci. Eng. C*, 2019, **99**, 1092-1098.
